# Supplementary material for: Mobile Elements Harboring Heavy Metal and Bacitracin Resistance Genes Are Common among Listeria monocytogenes Strains Persisting on Dairy Farms
Source: PubMed Central journal article supplement (PMC8386393; doi:10.1128/msphere.00383-21), 2021-07-07

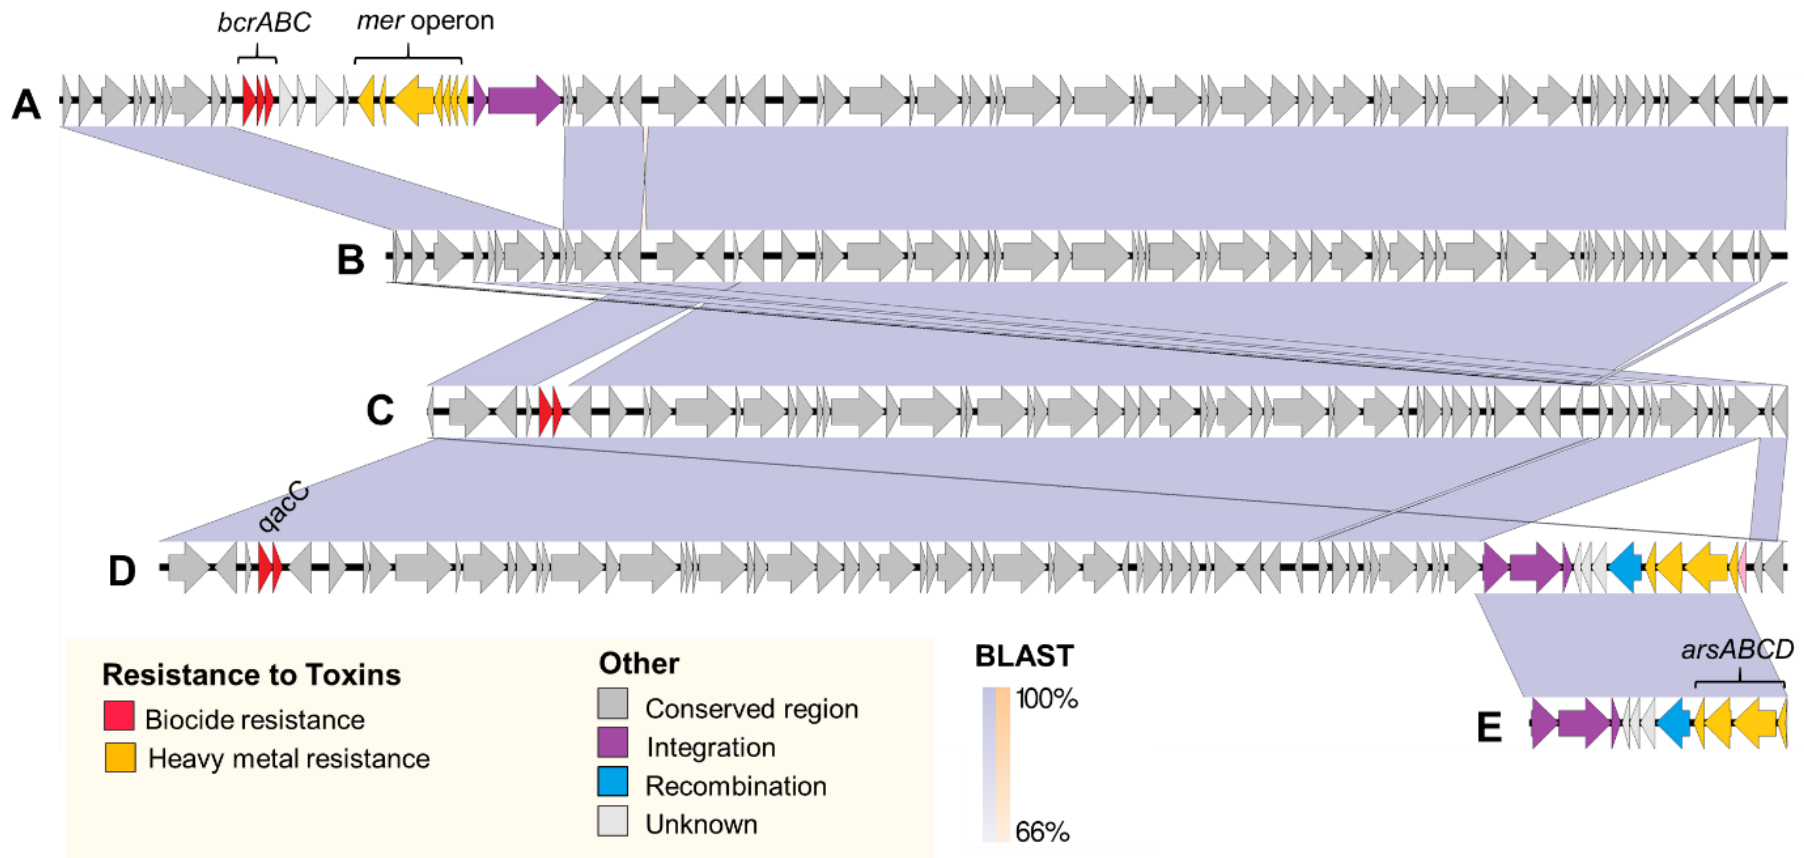

Supplement: msphere.00383-21-sf001.pdf [file msphere.00383-21-sf001.pdf]
