# Supplementary material for: Mobile Elements Harboring Heavy Metal and Bacitracin Resistance Genes Are Common among Listeria monocytogenes Strains Persisting on Dairy Farms
Source: PubMed Central journal article supplement (PMC8386393; doi:10.1128/msphere.00383-21), 2021-07-07

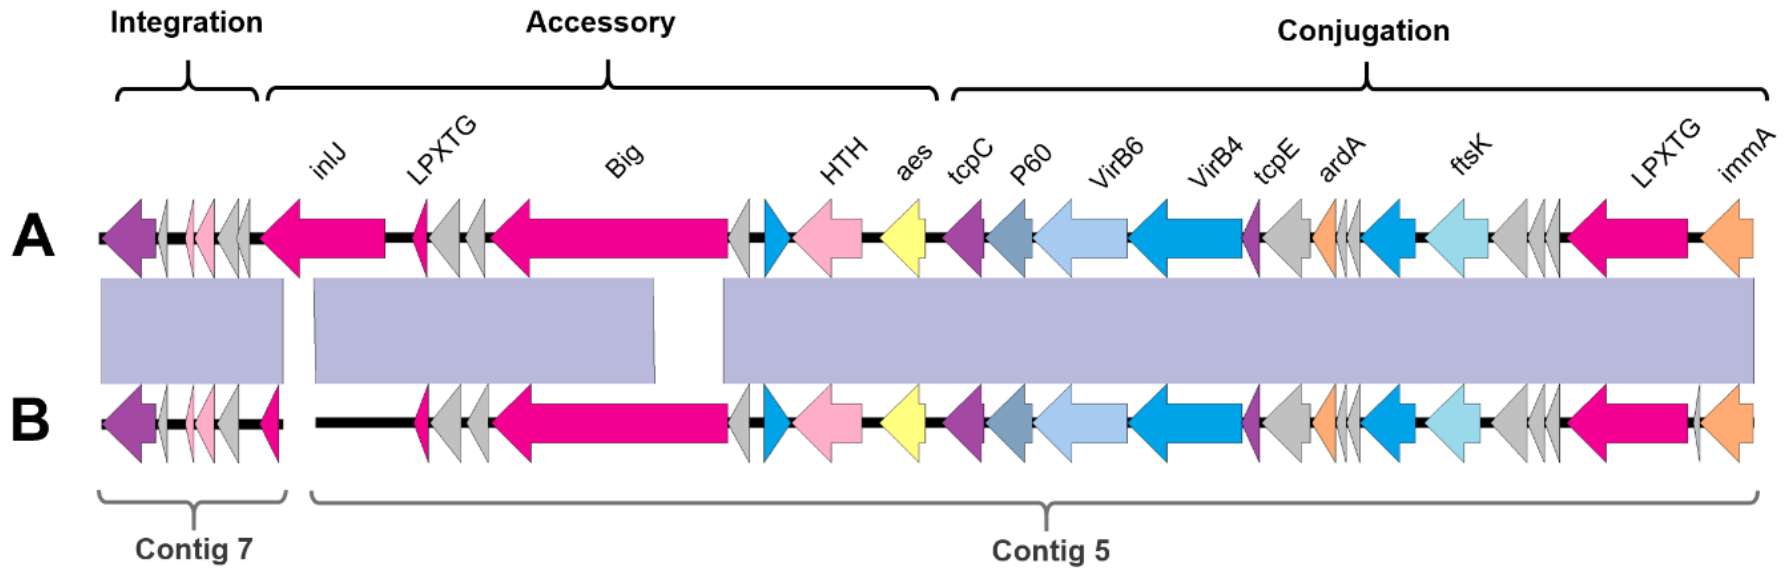

| Mobile elements                                                   | Other                                             |
|-------------------------------------------------------------------|---------------------------------------------------|
| <span style="color: lightblue;">█</span> Chromosome segregation   | <span style="color: magenta;">█</span> Adhesion   |
| <span style="color: purple;">█</span> Integration, conjugation    | <span style="color: yellow;">█</span> Metabolism  |
| <span style="color: blue;">█</span> Peptidoglycan hydrolysis      | <span style="color: pink;">█</span> Transcription |
| <span style="color: cyan;">█</span> Replication, recombination    | <span style="color: gray;">█</span> Unknown       |
| <span style="color: orange;">█</span> Repression, anti-repression |                                                   |

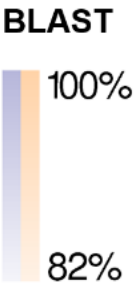

Supplement: msphere.00383-21-sf005.pdf [file msphere.00383-21-sf005.pdf]
