# Supplementary material for: Mobile Elements Harboring Heavy Metal and Bacitracin Resistance Genes Are Common among Listeria monocytogenes Strains Persisting on Dairy Farms
Source: PubMed Central journal article supplement (PMC8386393; doi:10.1128/msphere.00383-21), 2021-07-07

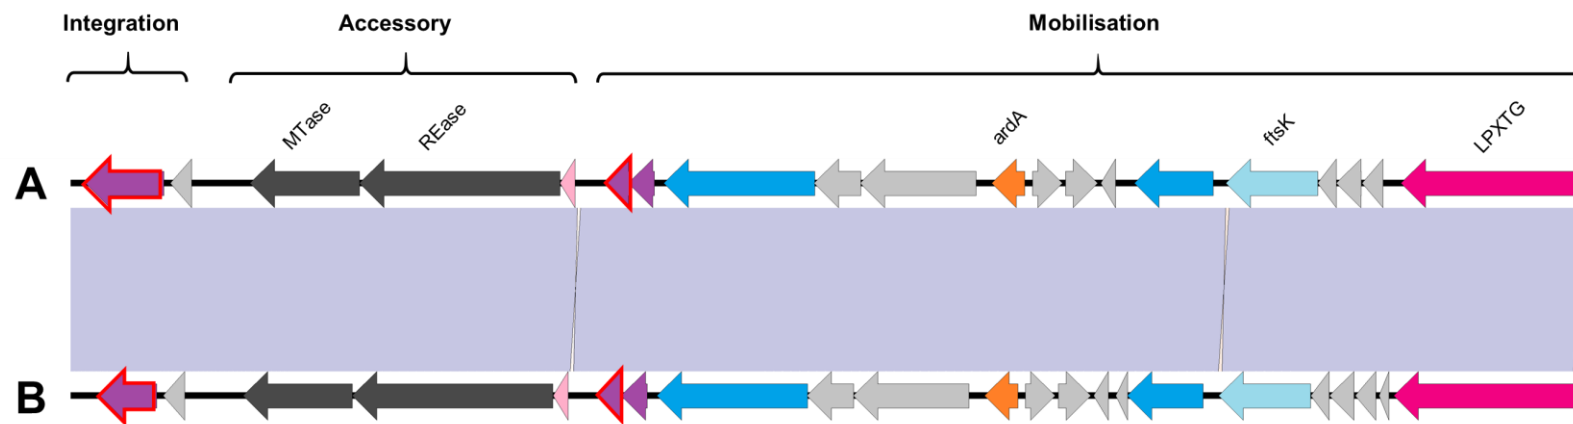

| Mobile elements |                             | Other |                          |
|-----------------|-----------------------------|-------|--------------------------|
|                 | Chromosome segregation      |       | Adhesion                 |
|                 | Integration, conjugation    |       | Restriction-modification |
|                 | Peptidoglycan hydrolysis    |       | Transcription            |
|                 | Replication, recombination  |       | Unknown                  |
|                 | Repression, anti-repression |       |                          |

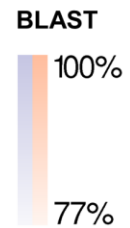

Supplement: msphere.00383-21-sf006.pdf [file msphere.00383-21-sf006.pdf]
