# Supplementary material for: Mobile Elements Harboring Heavy Metal and Bacitracin Resistance Genes Are Common among Listeria monocytogenes Strains Persisting on Dairy Farms
Source: PubMed Central journal article supplement (PMC8386393; doi:10.1128/msphere.00383-21), 2021-07-07
Supplement: msphere.00383-21-sf007.pdf [file msphere.00383-21-sf007.pdf]

**Listeria**  
str. HC177 phage

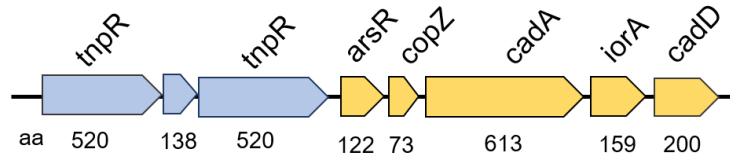

**Erysipelothrix**  
str. LV19 phage

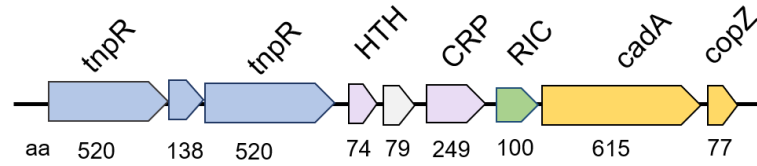

**Streptococcus**  
phage Javan630

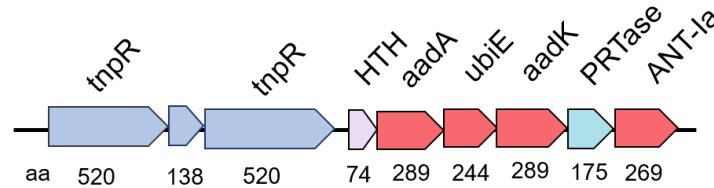

**Listeria**  
str. PNUSAL003131  
phage

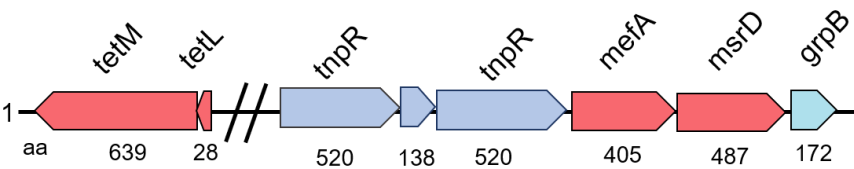

**Listeria**  
str. 871181 phage

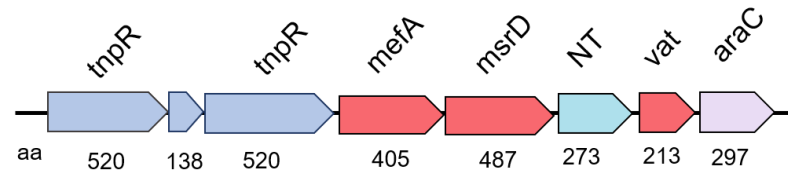

**Listeria**  
str. HC258 phage

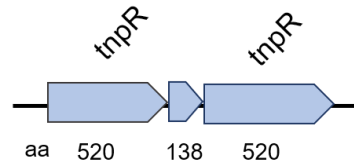

**Streptococcus**  
phage phi M46.1

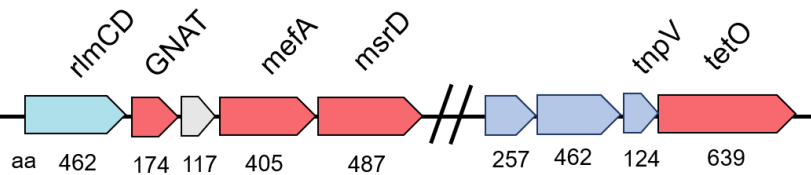

- |                                                                     |                                                               |
|---------------------------------------------------------------------|---------------------------------------------------------------|
| <span style="color: red;">■</span> Antimicrobial resistance         | <span style="color: lightblue;">■</span> Transferase activity |
| <span style="color: yellow;">■</span> Heavy metal resistance        | <span style="color: lightgreen;">■</span> Stress response     |
| <span style="color: lightblue;">■</span> Integration, recombination | <span style="color: lightgrey;">■</span> Unknown              |
| <span style="color: lightpurple;">■</span> Transcription            |                                                               |
