# Supplementary material for: Mobile Elements Harboring Heavy Metal and Bacitracin Resistance Genes Are Common among Listeria monocytogenes Strains Persisting on Dairy Farms
Source: PubMed Central journal article supplement (PMC8386393; doi:10.1128/msphere.00383-21), 2021-07-07
Supplement: msphere.00383-21-st001.pdf [file msphere.00383-21-st001.pdf]

**Table S1.** Phage genomes obtained from GenBank that were used to aid the phylogenetic and taxonomic classification of prophages detected among the 250 *Listeria monocytogenes* genomes from this study.

| <b>Phage name</b> | <b>Accession</b> | <b>Family</b>         | <b>Genus</b>         | <b>Host</b>          |
|-------------------|------------------|-----------------------|----------------------|----------------------|
| A006              | NC_009815.1      | <i>Siphoviridae</i>   | unclassified         | <i>Listeria</i>      |
| A118              | NC_003216.1      | <i>Siphoviridae</i>   | unclassified         | <i>Listeria</i>      |
| A500              | NC_009810.1      | <i>Siphoviridae</i>   | unclassified         | <i>Listeria</i>      |
| A511              | NC_009811.2      | <i>Herelleviridae</i> | <i>Pecentumvirus</i> | <i>Listeria</i>      |
| B025              | NC_009812.1      | <i>Siphoviridae</i>   | <i>Psavirus</i>      | <i>Listeria</i>      |
| B054              | NC_009813.1      | <i>Myoviridae</i>     | unclassified         | <i>Listeria</i>      |
| Javan630          | MK448997.1       | <i>Siphoviridae</i>   | unclassified         | <i>Streptococcus</i> |
| LP-030-2          | NC_021539.2      | <i>Siphoviridae</i>   | <i>Psavirus</i>      | <i>Listeria</i>      |
| LP-030-3          | NC_024384.1      | <i>Siphoviridae</i>   | unclassified         | <i>Listeria</i>      |
| LP-037            | NC_021787.2      | <i>Siphoviridae</i>   | <i>Homburgvirus</i>  | <i>Listeria</i>      |
| LP-048            | NC_024359.1      | <i>Herelleviridae</i> | <i>Pecentumvirus</i> | <i>Listeria</i>      |
| LP-101            | NC_024387.1      | <i>Siphoviridae</i>   | <i>Psavirus</i>      | <i>Listeria</i>      |
| LP-HM00113468     | MT500540.1       | <i>Siphoviridae</i>   | <i>Psavirus</i>      | <i>Listeria</i>      |
| P100              | NC_007610.1      | <i>Herelleviridae</i> | <i>Pecentumvirus</i> | <i>Listeria</i>      |
| P70               | NC_018831.1      | <i>Siphoviridae</i>   | <i>Homburgvirus</i>  | <i>Listeria</i>      |
| PSA               | NC_003291        | <i>Siphoviridae</i>   | <i>Psavirus</i>      | <i>Listeria</i>      |
| PSU-VKH-LP019     | MH341451         | <i>Siphoviridae</i>   | unclassified         | <i>Listeria</i>      |
| PSU-VKH-LP040     | MH341452         | <i>Siphoviridae</i>   | unclassified         | <i>Listeria</i>      |
| PSU-VKH-LP041     | MH341453         | <i>Myoviridae</i>     | unclassified         | <i>Listeria</i>      |
| vB_LmoS_188       | NC_028871.1      | <i>Siphoviridae</i>   | unclassified         | <i>Listeria</i>      |
