# Supplementary material for: Mobile Elements Harboring Heavy Metal and Bacitracin Resistance Genes Are Common among Listeria monocytogenes Strains Persisting on Dairy Farms
Source: PubMed Central journal article supplement (PMC8386393; doi:10.1128/msphere.00383-21), 2021-07-07
Supplement: msphere.00383-21-st002.pdf [file msphere.00383-21-st002.pdf]

**Table S2.** Genes positively or negatively associated (Bonferroni-corrected  $p < .05$ ) with persistent clades among the 233 *L. monocytogenes* Lineage II isolates of this study.

| Element                   | Protein Accession | Annotation or domain                        | Odds ratio | Bonferroni p |
|---------------------------|-------------------|---------------------------------------------|------------|--------------|
| type VII secretion system | WP_026750033      | ESAT-6 secretion machinery protein EssC     | 7.11       | 1.5E-04      |
| type VII secretion system | WP_026750032      | DUF5082                                     | 7.11       | 1.5E-04      |
| type VII secretion system | WP_003731422      | hypothetical protein                        | 6.95       | 1.9E-04      |
| hypervariable hotspot 4   | WP_061668643      | hypothetical protein                        | inf        | 2.1E-07      |
| hypervariable hotspot 8   | WP_003733794      | hypothetical protein                        | 4.60       | 5.8E-03      |
| hypervariable hotspot 8   | WP_026749868      | immunity protein (Imm-NTF2 -domain)         | 4.60       | 5.8E-03      |
| hypervariable hotspot 8   | WP_003721523      | DUF4274                                     | 4.49       | 1.1E-02      |
| IS3-like mobile element   | EAG2033583        | SAM-dependent methyltransferase, partial    | 6.14       | 8.3E-05      |
| phage                     | YP_009907771      | hypothetical protein                        | 8.33       | 6.7E-07      |
| phage                     | YP_009044813      | hypothetical protein                        | 6.23       | 4.3E-05      |
|                           | WP_003722049      | 1,4-beta-N-acetylmuramoylhydrolase          | 10.01      | 4.6E-04      |
|                           | WP_003722051      | ribonuclease BN                             | 7.21       | 4.3E-06      |
|                           | WP_009933017      | hypothetical protein                        | 7.73       | 2.1E-02      |
|                           | WP_026749741      | biofilm-associated protein BapL             | 7.11       | 1.5E-04      |
|                           | WP_010989981      | hypothetical protein                        | 4.33       | 4.9E-02      |
| CRISPR-cas IIA            | WP_014601172      | CRISPR-associated endonuclease Cas9         | 0.00       | 3.2E-03      |
| CRISPR-cas IIA            | WP_014601170      | CRISPR-associated protein Csn2              | 0.00       | 6.7E-04      |
| CRISPR-cas IIA            | WP_003723648      | CRISPR-associated endoribonuclease Cas2     | 0.00       | 6.7E-04      |
| CRISPR-cas IIA            | WP_009925355      | CRISPR-associated protein Cas4              | 0.00       | 2.8E-14      |
| CRISPR-cas IIA            | WP_014601171      | CRISPR-associated endonuclease Cas1         | 0.00       | 6.7E-04      |
| type VII secretion system | WP_05431447       | ESAT-6 secretion machinery protein          | 0.09       | 4.9E-08      |
| type VII secretion system | WP_009924118      | DUF4176                                     | 0.09       | 4.9E-08      |
| type VII secretion system | WP_003724890      | hypothetical protein                        | 0.09       | 4.9E-08      |
| type VII secretion system | WP_009924116      | hypothetical protein                        | 0.09       | 4.9E-08      |
| type VII secretion system | WP_070275768      | hypothetical protein                        | 0.00       | 3.9E-08      |
| type VII secretion system | WP_031674920      | toxin B                                     | 0.00       | 3.9E-08      |
| hypervariable hotspot 8   | WP_012951470      | hypothetical protein                        | 0.22       | 5.8E-03      |
| hypervariable hotspot 8   | WP_009931454      | hypothetical protein                        | 0.21       | 5.0E-03      |
| hypervariable hotspot 8   | WP_014931350      | DUF3130                                     | 0.17       | 1.6E-04      |
| hypervariable hotspot 8   | ADB67935          | VOC family protein                          | 0.05       | 6.7E-10      |
| hypervariable hotspot 8   | WP_052672896      | chromosome segregation ATPase               | 0.00       | 2.8E-05      |
| hypervariable hotspot 8   | WP_045131475      | hypothetical protein                        | 0.00       | 2.8E-05      |
| hypervariable hotspot 8   | WP_031664941      | recombination and strand exchange inhibitor | 0.00       | 5.6E-06      |
| hypervariable hotspot 8   | WP_045131476      | hypothetical protein                        | 0.00       | 2.8E-05      |
| hypervariable hotspot 8   | WP_014600726      | AraC family transcriptional regulator       | 0.00       | 4.0E-11      |
| LmoJ3                     | WP_061661643      | DNA cytosine methyltransferase              | 0.00       | 2.8E-05      |
| LmoJ3                     | WP_069000933      | NgoFVII family restriction endonuclease     | 0.00       | 2.8E-05      |
| LmoJ3                     | WP_069000932      | XRE-family transcriptional regulator        | 0.00       | 2.8E-05      |
| phage                     | YP_009907759      | hypothetical protein                        | 0.13       | 2.1E-02      |
| phage                     | YP_009044855      | hypothetical protein                        | 0.07       | 2.7E-02      |
| phage                     | WP_003725093      | hypothetical protein                        | 0.05       | 2.9E-02      |
| phage                     | WP_003725092      | KTSC domain                                 | 0.05       | 2.9E-02      |

|       |              |                                            |      |         |
|-------|--------------|--------------------------------------------|------|---------|
| phage | WP_009917698 | hypothetical protein                       | 0.04 | 2.1E-07 |
| phage | NP_463476    | phage_Gp15 domain                          | 0.03 | 6.0E-03 |
| phage | WP_014930203 | DUF1642                                    | 0.02 | 1.4E-03 |
| phage | YP_001468391 | phage_GP20                                 | 0.02 | 3.0E-04 |
| phage | NP_463533    | gp68                                       | 0.02 | 1.3E-05 |
| phage | WP_020830757 | hypothetical protein                       | 0.00 | 6.7E-04 |
| phage | NP_463467    | major capsid protein                       | 0.00 | 2.8E-05 |
| phage | WP_003731437 | XRE family transcriptional regulator       | 0.00 | 1.5E-02 |
| phage | WP_014601102 | XRE family transcriptional regulator       | 0.00 | 1.5E-02 |
| phage | YP_001468393 | gp7                                        | 0.00 | 6.7E-04 |
| phage | YP_009907764 | YozE_SAM_like -domain                      | 0.00 | 2.8E-05 |
| phage | YP_009907767 | hypothetical protein                       | 0.00 | 1.5E-02 |
| phage | NP_463462    | putative terminase small subunit           | 0.00 | 2.8E-05 |
| phage | YP_009907763 | XRE-family transcriptional regulator       | 0.00 | 3.2E-03 |
| phage | WP_097528476 | hypothetical protein                       | 0.00 | 3.2E-03 |
| phage | YP_008126752 | Sipho_Gp157                                | 0.00 | 3.2E-03 |
| phage | YP_009907755 | GP47 protein                               | 0.00 | 1.5E-02 |
| phage | WP_003733717 | helix-turn-helix domain-containing protein | 0.00 | 1.5E-02 |
|       | WP_054314211 | cell wall anchor protein                   | 0.10 | 9.6E-07 |

---
